# Supplementary material for: Abscisic Acid Receptors Modulate Metabolite Levels and Phenotype in Arabidopsis Under Normal Growing Conditions
Source: Metabolites. 2019 Oct 24;9(11):249. doi: 10.3390/metabo9110249 (PMC6918416; doi:10.3390/metabo9110249)
Supplement: Supplementary file 1 [file metabolites-09-00249-s001.xlsx]

## Sheet: Sheet1
Supplementary Table 1 Metabolites in plants idenfified based on UPLC/MS
Name	rt	rtmin	exact mass	mass error	formula	KEGG NO.
Fumaric acid	193.178	3.22	116.011	8	C4H4O4	C00122
L-Glutamine	125.271	2.09	146.069	0	C5H10N2O3	C00064
Citric acid	159.85	2.66	192.027	2	C6H8O7	C00158
Gluconic acid	92.7039	1.55	196.058	1	C6H12O7	C00257
cGMP	231.51	3.86	345.047	3	C10H12N5O7P	C00942
L-Proline	100.811	1.68	115.063	3	C5H9NO2	C00148
L-Valine	117.091	1.95	117.079	0	C5H11NO2	C00183
Nicotinic acid	151.011	2.52	123.032	2	C6H5NO2	C00253
L-Asparagine	87.7861	1.46	132.054	0	C4H8N2O3	C00152
L-Methionine	154.096	2.57	149.051	2	C5H11NO2S	C00073
Histidine	73.6947	1.23	155.07	2	C6H9N3O2	C00768
L-Phenylalanine	285.829	4.76	165.079	0	C9H11NO2	C00079
L-Arginine	86.453	1.44	174.112	4	C6H14N4O2	C00062
Uridine	214.417	3.57	244.07	2	C9H12N2O6	C00299
Adenosine	241.87	4.03	267.097	2	C10H13N5O4	C00212
Guanosine	247.108	4.12	283.092	2	C10H13N5O5	C00387
Vitamin B2	385.1	6.42	376.138	3	C17H20N4O6	C00255
beta-Alanine	89.0957	1.48	89.0477	1	C3H7NO2	C00099
rt	retention time (second)
rtmin	retention time minute
exact mass	m/z
mass error	ppm
